# Supplementary material for: Assessment of a Clinical Trial–Derived Survival Model in Patients With Metastatic Castration-Resistant Prostate Cancer
Source: PubMed Central journal article supplement (PMC7823224; doi:10.1001/jamanetworkopen.2020.31730), 2021-01-22
Supplement: jamanetwopen-e2031730-s001.pdf [file jamanetwopen-e2031730-s001.pdf]

## Supplementary Online Content

Coquet J, Bievre N, Billaut V, et al. Assessment of a clinical trial–derived survival model in patients with metastatic castration-resistant prostate cancer. *JAMA Netw Open*. 2021;4(1):e2031730. doi:10.1001/jamanetworkopen.2020.31730

**eTable 1.** Medications Used to Identify Receipt of Hormone Therapy

**eTable 2.** Variables From the DREAM Challenge RCT-Trained Model Also Identified in EHR Data

**eTable 3.** Variables From the DREAM Challenge RCT-Trained Model Included in EHR-Trained Models

**eTable 4.** Log-Transformed Variables

**eTable 5.** Coefficients of the Top 10 Variables in the Best-Performing EHR-Trained Models

**eTable 6.** Number of Encounters in the Year After Metastatic CRPC Diagnosis, Stratified by Patient Race

**eFigure.** 5-Year Overall Survival Among Patients with Metastatic CRPC in the EHR Cohort, Stratified by Patient Race

This supplementary material has been provided by the authors to give readers additional information about their work.

**eTable 1.** Medications Used to Identify Receipt of Hormone Therapy

| <b>Generic Name</b> | <b>RxNorm</b> |
|---------------------|---------------|
| Flutamide           | 4508          |
| Ketoconazole        | 6135          |
| Cyproterone Acetate | 22054         |
| Nilutamide          | 31805         |
| Triptorelin         | 38782         |
| Leuprolide          | 42375         |
| Goserelin           | 50610         |
| Histrelin           | 50975         |
| Zoladex             | 58328         |
| Bicalutamide        | 83008         |
| Casodex             | 151495        |
| Nizoral             | 202692        |
| Goserelin Acetate   | 203146        |
| Leuprolide Acetate  | 203217        |
| Leuprorelin Acetate | 203217        |
| Lupron              | 203852        |
| Nilandron           | 218741        |
| Triptorelin Pamoate | 338529        |
| Eligard             | 352619        |
| Degarelix           | 475230        |
| Vantas              | 606382        |
| Firmagon            | 858122        |
| Trelstar            | 905054        |
| Histrelin Acetate   | 1294622       |

**eTable 2.** Variables From the DREAM Challenge RCT-Trained Model Also Identified in EHR Data

| <b>Rank in the RCT-trained Model</b> | <b>Variable</b>                 | <b>Type</b> | <b>Missingness in EHRs data</b> |
|--------------------------------------|---------------------------------|-------------|---------------------------------|
| 1                                    | Liver Lesion(s)                 | Binary      | 100.0%                          |
| 2                                    | Patient Performance Status      | Categorical | 100.0%                          |
| 3                                    | Target Lesion(s)                | Binary      | 100.0%                          |
| 4                                    | Alkaline Phosphatase            | Numerical   | 18.5%                           |
| 5                                    | Prostate Specific Antigen       | Numerical   | 41.3%                           |
| 6                                    | Hemoglobin                      | Numerical   | 18.1%                           |
| 7                                    | Hematocrit                      | Numerical   | 18.1%                           |
| 8                                    | Ratio Lymphocyte / Leucocyte    | Numerical   | 20.1%                           |
| 9                                    | Aspartate Aminotransferase      | Numerical   | 18.3%                           |
| 10                                   | Albumin                         | Numerical   | 18.3%                           |
| 11                                   | Red Blood Cells                 | Numerical   | 18.1%                           |
| 12                                   | Systolic Blood Pressure         | Numerical   | 7.8%                            |
| 13                                   | Lactate Dehydrogenase           | Numerical   | 88.1%                           |
| 14                                   | Body Mass Index                 | Numerical   | 12.1%                           |
| 15                                   | Diastolic Blood Pressure        | Numerical   | 7.8%                            |
| 16                                   | Blood Urea Nitrogen             | Numerical   | 20.3%                           |
| 17                                   | Alanine Transaminase            | Numerical   | 19.3%                           |
| 18                                   | Calculated Creatinine Clearance | Numerical   | 100.0%                          |
| 19                                   | Sodium                          | Numerical   | 20.3%                           |
| 20                                   | Creatinine Clearance            | Numerical   | 100.0%                          |
| 21                                   | Glucose                         | Numerical   | 20.3%                           |
| 22                                   | Weight                          | Numerical   | 12.3%                           |
| 23                                   | Specific Gravity                | Numerical   | 100.0%                          |
| 24                                   | Total Protein                   | Numerical   | 18.5%                           |
| 25                                   | Calcium                         | Numerical   | 20.7%                           |
| 26                                   | Total Bilirubin                 | Numerical   | 29.8%                           |
| 27                                   | Creatinine                      | Numerical   | 100.0%                          |
| 28                                   | Ratio Neutrophil / Leucocyte    | Numerical   | 20.1%                           |
| 29                                   | White Blood Cells               | Numerical   | 18.1%                           |
| 30                                   | Neutrophils                     | Numerical   | 20.1%                           |
| 31                                   | Ratio Monocyte / Leucocyte      | Numerical   | 19.5%                           |
| 32                                   | Pulse                           | Numerical   | 7.2%                            |
| 33                                   | Potassium                       | Numerical   | 20.3%                           |
| 34                                   | Height                          | Numerical   | 12.5%                           |

|    |                                                                  |             |        |
|----|------------------------------------------------------------------|-------------|--------|
| 35 | Monocyte                                                         | Numerical   | 19.5%  |
| 36 | Race Category: White                                             | Binary      | 0.0%   |
| 37 | Patient received analgesics                                      | Binary      | 2.9%   |
| 38 | Ratio Basophils / Leucocyte                                      | Numerical   | 19.5%  |
| 39 | Patient received anti androgens                                  | Binary      | 2.9%   |
| 40 | Platelet Count                                                   | Numerical   | 17.9%  |
| 41 | Eosinophil                                                       | Numerical   | 19.5%  |
| 42 | Ratio Eosinophil / Leucocyte                                     | Numerical   | 19.5%  |
| 43 | Age group                                                        | Categorical | 0.0%   |
| 44 | If the patient is from East Europe                               | Binary      | 0.0%   |
| 45 | Lymphocytes                                                      | Numerical   | 20.1%  |
| 46 | Lymph node Lesion(s)                                             | Binary      | 100.0% |
| 47 | Testosterone                                                     | Numerical   | 100.0% |
| 48 | Patient received gomadotropin                                    | Binary      | 2.9%   |
| 49 | If the patient has a medical history of Cardiac disorders        | Binary      | 0.2%   |
| 50 | If the patient has a medical history of Vascular disorders       | Binary      | 0.2%   |
| 51 | If the patient has a medical history of Myocardial Infarction    | Binary      | 0.2%   |
| 52 | If the patient received Prostatectomy                            | Binary      | 3.9%   |
| 53 | Phosphorus                                                       | Numerical   | 84.4%  |
| 54 | Prostate Lesion(s)                                               | Binary      | 100.0% |
| 55 | If the patient received Radiotherapy                             | Binary      | 0.2%   |
| 56 | If the patient received Bisphosponate                            | Binary      | 2.9%   |
| 57 | If the patient received a Bilateral Orchidectomy                 | Binary      | 3.9%   |
| 58 | If the patient has a medical history of Psychiatric disorders    | Binary      | 0.2%   |
| 59 | If the patient is from West Europe                               | Binary      | 0.0%   |
| 60 | If the patient has a Medical History of Congestive Heart Failure | Binary      | 0.2%   |
| 61 | Magnesium                                                        | Numerical   | 76.6%  |
| 62 | If the patient received Bisphosponate Ace Inhibitors             | Binary      | 2.9%   |
| 63 | If the patient received Orchidectomy (including bilateral)       | Binary      | 3.9%   |
| 64 | If the patient has a Medical History of Pulmonary Embolism       | Binary      | 0.2%   |
| 65 | Lung Lesion(s)                                                   | Binary      | 100.0% |
| 66 | If the patient has a Medical History of Spinal Cord Compression  | Binary      | 0.2%   |
| 67 | If the patient received Bilateral Lymphadenectomy                | Binary      | 3.9%   |

|    |                                                                                                |           |        |
|----|------------------------------------------------------------------------------------------------|-----------|--------|
| 68 | Pleura Lesion(s)                                                                               | Binary    | 100.0% |
| 69 | If the patient has a Medical History of Metabolism & Nutrition disorders                       | Binary    | 0.2%   |
| 70 | If the patient has a Medical History of Diabetes                                               | Binary    | 0.2%   |
| 71 | If the patient has a Medical History of Respiratory, Thoracic & Mediastinal disorders          | Binary    | 0.2%   |
| 72 | If the patient received Glucocorticoids                                                        | Binary    | 2.9%   |
| 73 | If the patient received Imidazole                                                              | Binary    | 2.9%   |
| 74 | If the patient has a Medical History of Hepatobiliary disorders                                | Binary    | 0.2%   |
| 75 | If the patient has a Medical History of Chronic Obstructive Pulmonary disease                  | Binary    | 0.2%   |
| 76 | If the patient received Estrogens                                                              | Binary    | 2.9%   |
| 77 | If the patient has a Medical History of Renal & Urinary disorders                              | Binary    | 0.2%   |
| 78 | If the patient has a Medical History of Gastrointestinal disorders                             | Binary    | 0.2%   |
| 79 | If the patient has a Medical History of Infections & Infestations                              | Binary    | 0.2%   |
| 80 | If the patient has a Medical History of Injury, Poison & Procedural                            | Binary    | 0.2%   |
| 81 | If the patient received HMG-CoA Reductase Inhibitors                                           | Binary    | 2.9%   |
| 82 | If the patient received Corticosteroid                                                         | Binary    | 2.9%   |
| 83 | If the patient has a Medical History of Ear & Labyrinth disorders                              | Binary    | 0.2%   |
| 84 | If the patient is from North America                                                           | Binary    | 0.0%   |
| 85 | Race Category: Other                                                                           | Binary    | 0.0%   |
| 86 | If the patient is from South America                                                           | Binary    | 0.0%   |
| 87 | If the patient has a Medical History of Immune System disorders                                | Binary    | 0.2%   |
| 88 | If the patient has a Medical History of Cerebrovascular Accident (Hemorrhagic and/or Ischemic) | Binary    | 0.2%   |
| 89 | If the patient has a Medical History of Endocrine disorders                                    | Binary    | 0.2%   |
| 90 | If the patient has a Medical History of Skin & Subcutaneous tissue disorders                   | Binary    | 0.2%   |
| 91 | If the patient has a Medical History of Blood & Lymphatic system disorders                     | Binary    | 0.2%   |
| 92 | Kidney Lesion(s)                                                                               | Numerical | 100.0% |
| 93 | If the patient has a Medical History of Congenital, Familial & Genetic disorders               | Binary    | 0.2%   |
| 94 | Race Category: Asian                                                                           | Binary    | 0.0%   |
| 95 | If the patient has a Medical History of                                                        | Binary    | 0.2%   |

|     |                                                                |        |        |
|-----|----------------------------------------------------------------|--------|--------|
|     | investigations                                                 |        |        |
| 96  | If the patient received Anti-Estrogens                         | Binary | 2.9%   |
| 97  | If the patient has a Medical History of Deep Venous Thrombosis | Binary | 0.2%   |
| 98  | If the patient received Beta Blocking Agents                   | Binary | 2.9%   |
| 99  | Race Category: Black                                           | Binary | 0.0%   |
| 100 | Other Lesion(s)                                                | Binary | 100.0% |
| 101 | If the patient is from Asia                                    | Binary | 0.0%   |

Abbreviations: EHRs, Electronic Health Records; RCT, Randomized Clinical Trial.

**eTable 3.** Variables From the DREAM Challenge RCT-Trained Model Included in EHR-Trained Models

| Variable                                                                              | All independent variables (no covariates) | Top 25 variables selected by RFE | Top 15 variables | Top 10 variables |
|---------------------------------------------------------------------------------------|-------------------------------------------|----------------------------------|------------------|------------------|
| Albumin                                                                               | Y                                         | Y                                | Y                | Y                |
| Alkaline Phosphatase                                                                  | Y                                         | Y                                | Y                | Y                |
| Aspartate Aminotransferase                                                            | Y                                         | Y                                | Y                | Y                |
| Body Mass Index                                                                       | Y                                         | Y                                | Y                | Y                |
| Lymphocytes                                                                           | Y                                         | Y                                | Y                | Y                |
| If the patient has a medical history of Cardiac disorders                             | Y                                         | Y                                | Y                | Y                |
| If the patient has a Medical History of Respiratory, Thoracic & Mediastinal disorders | Y                                         | Y                                | Y                | Y                |
| If the patient received Radiotherapy                                                  | Y                                         | Y                                | Y                | Y                |
| Prostate Specific Antigen                                                             | Y                                         | Y                                | Y                | Y                |
| If the patient has a Medical History of Spinal Cord Compression                       | Y                                         | Y                                | Y                | Y                |
| Patient received analgesics                                                           | Y                                         | Y                                | Y                | N                |
| If the patient has a Medical History of Congestive Heart Failure                      | Y                                         | Y                                | Y                | N                |
| Hemoglobin                                                                            | Y                                         | Y                                | Y                | N                |
| Pulse                                                                                 | Y                                         | Y                                | Y                | N                |
| Systolic Blood Pressure                                                               | Y                                         | Y                                | Y                | N                |
| Diastolic Blood Pressure                                                              | Y                                         | Y                                | N                | N                |
| Glucose                                                                               | Y                                         | Y                                | N                | N                |
| If the patient received Glucocorticoids                                               | Y                                         | Y                                | N                | N                |
| If the patient has a Medical History of Ear & Labyrinth disorders                     | Y                                         | Y                                | N                | N                |
| If the patient has a Medical History of Immune System disorders                       | Y                                         | Y                                | N                | N                |
| If the patient has a Medical History of Infections & Infestations                     | Y                                         | Y                                | N                | N                |
| If the patient has a Medical History of Renal & Urinary disorders                     | Y                                         | Y                                | N                | N                |
| If the patient has a Medical History of Skin & Subcutaneous tissue disorders          | Y                                         | Y                                | N                | N                |
| If the patient has a medical history of Myocardial Infarction                         | Y                                         | Y                                | N                | N                |
| Ratio Neutrophil / Leucocyte                                                          | Y                                         | Y                                | N                | N                |

|                                                                                                |   |   |   |   |
|------------------------------------------------------------------------------------------------|---|---|---|---|
| If the patient received Bisphosphonate Ace Inhibitors                                          | Y | N | N | N |
| Age group                                                                                      | Y | N | N | N |
| Alanine Transaminase                                                                           | Y | N | N | N |
| Patient received anti androgens                                                                | Y | N | N | N |
| If the patient received Anti-Estrogens                                                         | Y | N | N | N |
| If the patient received Beta Blocking Agents                                                   | Y | N | N | N |
| If the patient received Bisphosphonate                                                         | Y | N | N | N |
| Blood Urea Nitrogen                                                                            | Y | N | N | N |
| Calcium                                                                                        | Y | N | N | N |
| If the patient has a Medical History of Cerebrovascular Accident (Hemorrhagic and/or Ischemic) | Y | N | N | N |
| If the patient has a Medical History of Chronic Obstructive Pulmonary disease                  | Y | N | N | N |
| If the patient has a Medical History of Deep Venous Thrombosis                                 | Y | N | N | N |
| Ratio Eosinophil / Leucocyte                                                                   | Y | N | N | N |
| If the patient received Estrogens                                                              | Y | N | N | N |
| Patient received gomadotropin                                                                  | Y | N | N | N |
| Height                                                                                         | Y | N | N | N |
| If the patient received HMG-CoA Reductase Inhibitors                                           | Y | N | N | N |
| If the patient received Imidazole                                                              | Y | N | N | N |
| If the patient has a Medical History of Blood & Lymphatic system disorders                     | Y | N | N | N |
| If the patient has a Medical History of Congenital                                             | Y | N | N | N |
| If the patient has a Medical History of Endocrine disorders                                    | Y | N | N | N |
| If the patient has a Medical History of Injury, Poison & Procedural                            | Y | N | N | N |
| If the patient has a Medical History of investigations                                         | Y | N | N | N |
| If the patient has a medical history of Psychiatric disorders                                  | Y | N | N | N |
| Monocyte                                                                                       | Y | N | N | N |
| Sodium                                                                                         | Y | N | N | N |
| Neutrophils                                                                                    | Y | N | N | N |
| If the patient received Orchiectomy (including bilateral)                                      | Y | N | N | N |



|                                                            |   |   |   |   |
|------------------------------------------------------------|---|---|---|---|
| Platelet Count                                             | Y | N | N | N |
| Potassium                                                  | Y | N | N | N |
| If the patient received Prostatectomy                      | Y | N | N | N |
| If the patient has a Medical History of Pulmonary Embolism | Y | N | N | N |
| Total Bilirubin                                            | Y | N | N | N |
| Total Protein                                              | Y | N | N | N |
| White Blood Cells                                          | Y | N | N | N |

Abbreviations: EHRs, Electronic Health Records; RCT, Randomized Clinical Trial; RFE, Recursive Feature Elimination.

**eTable 4.** Log-Transformed Variables

|                            |
|----------------------------|
| <b>Variables</b>           |
| Alanine transaminase       |
| Alkaline phosphatase       |
| Aspartate aminotransferase |
| Blood urea nitrogen        |
| Glucose                    |
| Lymphocytes                |
| Magnesium                  |
| Neutrophils                |
| Phosphorus                 |
| Prostate specific antigen  |
| Total bilirubin            |
| White blood cells          |

**eTable 5.** Coefficients of the Top 10 Variables in the Best-Performing EHR-Trained Models

| Rank | Variable                                 | Weight | HR    | Top 10 DREAM RCT model |
|------|------------------------------------------|--------|-------|------------------------|
| 1    | Lymphocytes 10 <sup>9</sup> /L           | -0.163 | 0.850 | N                      |
| 2    | Alkaline Phosphatase U/L                 | 0.133  | 1.142 | Y                      |
| 3    | Aspartate Aminotransferase U/L           | 0.127  | 1.135 | Y                      |
| 4    | Prostate Specific Antigen Ng/MI (PSA)    | 0.100  | 1.105 | Y                      |
| 5    | Ratio of Neutrophil Level Per Blood Cell | 0.084  | 1.087 | N                      |
| 6    | Spinal Cord Compression                  | 0.083  | 1.087 | N                      |
| 7    | Baseline Body Mass Index Kg/M2 (BMI)     | -0.082 | 0.922 | N                      |
| 8    | Hemoglobin G/Dl                          | -0.078 | 0.925 | Y                      |
| 9    | Pulse                                    | 0.074  | 1.077 | N                      |
| 10   | Albumin G/L                              | -0.074 | 0.929 | Y                      |

Abbreviations: HR, Hazard Ratio.

**eTable 6.** Number of Encounters in the Year After Metastatic CRPC Diagnosis, Stratified by Patient Race

|                         | <b>Non-Hispanic White</b> | <b>Asian</b>  | <b>Black</b>  | <b>Hispanic/Latino</b> | <b>Other</b>  | <b>p</b> |
|-------------------------|---------------------------|---------------|---------------|------------------------|---------------|----------|
| <b>All types</b>        | 67.97 ± 52.27             | 79.41 ± 70.67 | 74.92 ± 50.27 | 77.07 ± 57.27          | 67.95 ± 55.50 | 0.46     |
| <b>Oncology/Urology</b> | 23.73 ± 23.88             | 29.41 ± 35.03 | 27.88 ± 36.50 | 25.40 ± 21.05          | 27.27 ± 24.61 | 0.46     |
| <b>Primary Care</b>     | 3.56 ± 7.78               | 5.06 ± 11.37  | 2.88 ± 8.15   | 4.93 ± 10.14           | 3.73 ± 8.57   | 0.56     |

**eFigure.** 5-Year Overall Survival Among Patients with Metastatic CRPC in the EHR Cohort, Stratified by Patient Race

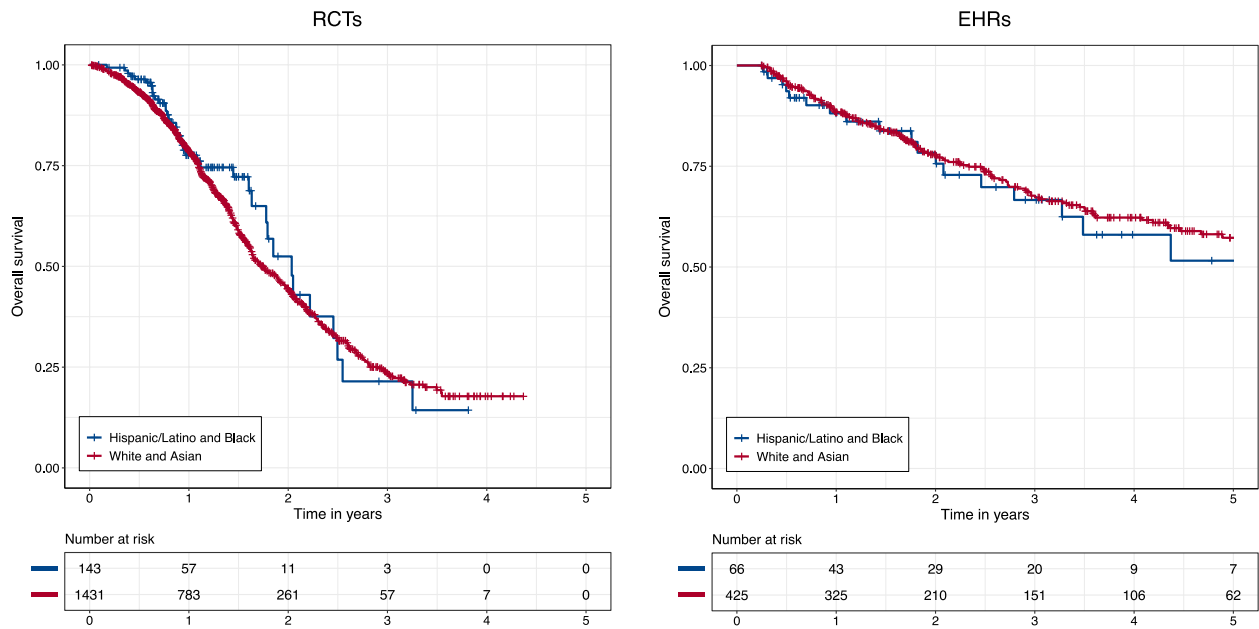

Kaplan-Meier plot of survival probability for White-Asian (red) and Hispanic/Latino-Black (blue) of the RCTs and the EHRs cohorts ( $P=.3$  and  $P=.8$ , respectively).
